# Supplementary material for: Post-Intensive Care Syndrome in Non-COVID-19 ICU Survivors during the COVID-19 Pandemic in South Korea: A Multicenter Prospective Cohort Study
Source: MDPI journal article supplement (doi:10.3390/jcm11226653), 2022-11-09
Supplement: s1 [file s1]

**Supplementary Table S1.** Characteristics of All Enrolled Participants

| Variables                   | Categories         | Total<br>(N=891) | Followed-up<br>(N=237) | Dropped out<br>(N=654) | P     |
|-----------------------------|--------------------|------------------|------------------------|------------------------|-------|
| Age, years                  |                    | 61.09±13.24      | 58.30±13.30            | 62.10±13.08            | <.001 |
| Male sex                    |                    | 531(59.6)        | 143(60.3)              | 338(59.3)              | .786  |
| Employed prior to admission |                    | 385(43.3)        | 119(50.4)              | 266(40.7)              | .010  |
| FCI prior to admission      | 0                  | 364(40.9)        | 100(42.2)              | 264(40.4)              | .858  |
|                             | 1                  | 305(34.2)        | 78(32.9)               | 227(34.7)              |       |
|                             | ≥ 2                | 222(24.9)        | 59(24.9)               | 163(24.9)              |       |
| Reason for ICU admission    | Postoperative care | 244(27.4)        | 74(31.2)               | 170(26.0)              | .166  |
|                             | Neurological       | 222(24.9)        | 66(27.8)               | 156(23.9)              |       |
|                             | Cardiovascular     | 179(20.1)        | 44(18.6)               | 135(20.6)              |       |
|                             | Respiratory        | 179(20.1)        | 38(16.0)               | 141(21.6)              |       |
|                             | Trauma             | 67(7.5)          | 15(6.3)                | 52(8.0)                | .055  |
| ICU type                    | Surgical           | 344(38.6)        | 104(43.9)              | 240(36.7)              |       |
|                             | Cardiovascular     | 172(19.3)        | 47(19.8)               | 125(19.1)              |       |
|                             | Neurological       | 164(18.4)        | 43(18.1)               | 121(18.5)              |       |
|                             | Medical            | 114(12.8)        | 18(7.6)                | 96(14.7)               |       |
|                             | Others             | 97(10.9)         | 25(10.5)               | 72(11.0)               |       |
| ICU Admission route         | ED                 | 494(55.4)        | 110(46.4)              | 384(58.7)              | .001  |
|                             | Others             | 397(44.6)        | 127(53.6)              | 270(41.3)              |       |
| Mechanical ventilation use  |                    | 178(20.0)        | 38(16.0)               | 140(21.4)              | .076  |
| Surgery                     |                    | 454(51.0)        | 134(56.5)              | 320(49.0)              | .047  |
| Delirium in ICU             |                    | 140(15.7)        | 25(10.5)               | 115(17.6)              | .011  |
| Discharge place             | Home               | 713(80.0)        | 209(88.2)              | 504(77.1)              | <.001 |
|                             | LTC                | 178(20.0)        | 28(11.8)               | 150(22.9)              |       |
| Severity                    | APACHE II          | 11.79±6.56       | 10.70±5.81             | 12.11±6.73             | .021  |
|                             | SAPS               | 34.48±16.29      | 31.92±15.08            | 35.83±16.79            | .071  |
| SOFA                        |                    | 4.68±2.79        | 4.37±2.61              | 4.79±2.85              | .271  |
| ICU length of stay, days    |                    | 4.81±7.48        | 4.02±4.28              | 5.10±8.33              | .011  |
| CCI                         |                    | 1.16±1.34        | 1.03±1.19              | 1.21±1.38              | .065  |

Abbreviations: APACHE:acute physiology and chronic health evaluation; CCI:charlson comorbidity index; ED:emergency department; FCI:functional comorbidity index; ICU:intensive care unit; LTC:long term care; SAPS:simplified acute physiology score; SOFA:sequential organ failure assessment.

**Supplementary Table S2.** Incidence and Prevalence of Post-Intensive Care Syndrome

| Variables     | Time after discharge | Total<br>N=237    |                    | Group A<br>N=104  |                    | Group B<br>N=133  |                    |
|---------------|----------------------|-------------------|--------------------|-------------------|--------------------|-------------------|--------------------|
|               |                      | Incidence<br>n(%) | Prevalence<br>n(%) | Incidence<br>n(%) | Prevalence<br>n(%) | Incidence<br>n(%) | Prevalence<br>n(%) |
| Anxiety       | 3 mon                | 26(11.0)          | 26(11.0)           | 17(16.3)          | 17(16.3)           | 9(6.8)            | 9(6.8)             |
|               | 6 mon                | 14(5.9)           | 22(9.3)            | 3(2.9)            | 6(5.8)             | 11(8.3)           | 16(12.0)           |
|               | 12 mon               | 13(5.5)           | 33(13.9)           | 13(12.5)          | 17(16.3)           | 6(4.5)            | 16(12.0)           |
| Depression    | 3 mon                | 54(22.8)          | 54(22.8)           | 27(26.0)          | 27(26.0)           | 27(20.3)          | 27(20.3)           |
|               | 6 mon                | 9(3.8)            | 30(12.7)           | 4(3.8)            | 13(12.5)           | 5(3.8)            | 17(12.8)           |
|               | 12 mon               | 37(15.6)          | 60(25.3)           | 11(10.6)          | 20(19.2)           | 26(19.5)          | 40(30.1)           |
| PTSD          | 3 mon                | 32(13.5)          | 32(13.5)           | 20(19.2)          | 20(19.2)           | 12(9.0)           | 12(9.0)            |
|               | 6 mon                | 10(4.2)           | 24(10.1)           | 5(4.8)            | 12(11.5)           | 5(3.8)            | 12(9.0)            |
|               | 12 mon               | 24(10.1)          | 39(16.5)           | 11(10.6)          | 15(14.4)           | 13(9.8)           | 24(18.0)           |
| Mental health | 3 mon                | 71(30.0)          | 71(30.0)           | 38(36.5)          | 38(36.5)           | 33(24.8)          | 33(24.8)           |
|               | 6 mon                | 13(5.5)           | 43(18.1)           | 5(4.8)            | 17(16.3)           | 8(6.0)            | 26(19.5)           |
|               | 12 mon               | 41(17.3)          | 73(30.8)           | 16(15.4)          | 27(26.0)           | 25(18.8)          | 46(34.6)           |
| Cognitive*    | 3 mon                | 41(20.9)          | 41(20.9)           | 12(16.7)          | 12(16.7)           | 29(23.4)          | 29(23.4)           |
|               | 6 mon                | 10(4.2)           | 31(15.8)           | 4(3.8)            | 15(20.8)           | 6(4.5)            | 16(12.9)           |
|               | 12 mon               | 38(16.0)          | 58(29.6)           | 6(5.8)            | 11(15.3)           | 32(24.1)          | 47(37.9)           |
| Physical      | 3 mon                | 35(14.8)          | 35(14.8)           | 18(17.3)          | 18(17.3)           | 17(12.8)          | 17(12.8)           |
|               | 6 mon                | 9(3.8)            | 30(12.7)           | 4(3.8)            | 16(15.4)           | 5(3.8)            | 14(10.5)           |
|               | 12 mon               | 11(4.6)           | 26(11.0)           | 6(5.8)            | 14(13.5)           | 5(3.8)            | 12(9.0)            |
| PICS-overall  | 3 mon                | 106(44.7)         | 106(44.7)          | 51(49.0)          | 51(49.0)           | 55(41.4)          | 55(41.4)           |
|               | 6 mon                | 23(9.7)           | 91(38.4)           | 10(9.6)           | 45(43.3)           | 13(9.8)           | 46(34.6)           |
|               | 12 mon               | 47(19.8)          | 112(47.3)          | 13(12.5)          | 41(39.4)           | 34(25.6)          | 71(53.4)           |

\*N=196 (Group A = 72, Group B =124)

Abbreviations: PICS:post-intensive care syndrome; PTSD:post-traumatic stress disorder.
